# Supplementary material for: Differential exoprotease activities confer tumor-specific serum peptidome patterns
Source: JCI journal article supplement (doi:10.1172/jci26022), 2005-12-08

## **Supplementary Data:**

**Supplementary\_Methods**

**Supplementary\_Table1**

**Supplementary\_Table2**

**Supplementary\_Table3**

**Supplementary\_Table4**

**Supplementary\_Figure1**

## Supplementary Methods

***Automated, solid-phase peptide extraction.*** Serum peptide profiling is done using a technology platform that was developed in our laboratory for simultaneous measurement of large numbers of serum polypeptides (1). It uses magnetic bead-based, solid-phase extraction of predominantly small peptides followed by a MALDI-TOF MS read-out. The system is intrinsically more sensitive than any surface capture on chips as spherical particles have larger combined surface areas than small-diameter spots. When combined with high-resolution MS, hundreds of peptides are detected in a single droplet of serum. In the current version, peptides are captured and concentrated using SiMAG-C8/K superparamagnetic, silica-based particles ( $\leq 1$  micron diameter; 80% iron oxide; non-porous), bearing C8 reversed-phase (RP) ligands (Chemicell). All analyses were performed in a 96-well format, using the same batch of C8 magnetic particles, in 0.2-mL polypropylene tubes (8x12-tube 'Temp Plate II'; USA Scientific). The protocol is based on a detailed investigation of serum handling, RP ligand and eluant selection (1), and is automated using a 'Genesis Freedom 100' (Tecan) liquid handling workstation for throughput and reproducibility. The system was programmed either directly via its standard software or, when individual wells needed to be accessed independently, indirectly through its work-lister capability. This system automates all of the liquid-handling steps, including magnetic separation via a robotic manipulating arm, mixing of eluates with MALDI matrix and deposition onto the Bruker 384-spot MALDI target plates. A computer randomization program is used to position case and control samples for both solid-phase extraction and mass spectrometry.

**Mass spectrometry.** Peptide profiles were analyzed with an Autoflex MALDI-TOF mass spectrometer (Bruker) equipped with a 337 nm nitrogen laser, a gridless ion source, delayed-extraction (DE) electronics, a high-resolution timed ion selector (TIS), and a 2 GHz digitizer. Separate spectra were obtained for two restricted mass-to-charge ( $m/z$ ) ranges, corresponding to polypeptides with molecular mass of 0.7-4 kDa (" $\leq 4$ kD") and 4-15 kDa (" $\geq 4$ kD") (assuming  $z = 1$ ), under specifically optimized instrument settings. Each spectrum was the result of 400 laser shots, per  $m/z$  segment per sample, delivered in four sets of 100 shots (at 50-Hz frequency) to each of four different locations on the surface of the spot. A weekly performance test with commercial human reference serum (# S-7023, lot 034K8937; Sigma) was done, and the effective laser energy delivered to the target was adjusted when necessary. The entire irradiation program was automated using the instrument's 'AutoXecute' function. Spectra were acquired in linear mode geometry under 20 kV (18.6 kV during DE) of ion accelerating and -1.3 kV multiplier potentials, and with gating of mass ions  $\leq 400$   $m/z$  ( $\leq 4$ kD segment) or  $\leq 3,000$   $m/z$  ( $\geq 4$ kD segment). DE was maintained for 80 ( $\leq 4$ kD) or 50 nanoseconds ( $\geq 4$ kD) to give appropriate time-lag focusing after each laser shot. Peptide samples were always mixed with two volumes of premade  $\alpha$ -cyano-4-hydroxycinnamic acid (ACCA) matrix solution (Agilent), deposited onto the stainless steel target surface, in every other column of the 384-spot layout, and allowed to dry at room temperature. Thirty fmoles (per peptide) and 500 fmoles (per protein) of commercially available calibration standards (Bruker # 206195 ( $< 4$ kD) and # 206355 ( $> 4$ kD)) were also mixed with ACCA matrix and separately deposited onto the target

plates, adjacent to each spotted serum sample (one sample / one standard), in the alternating columns. All spectra were acquired within less than 1-2 hours after completion of robotic sample processing, as we have noticed an adverse effect of increasing times between crystallization and mass spectral acquisition. The AutoFlex MALDI-TOF has a probe at the output of the laser, before the attenuator. We verified the accuracy of this monitoring device and then calibrated the settings of the attenuator (displayed on the computer screen as an arbitrary scale of 100 - 0 %) by measuring transmitted energy at varying %. This allowed us to generate a calibration curve to convert before-to-after attenuation laser energy. The optimal laser setting that had been empirically determined was then measured to yield 16- $\mu$ J energy per pulse, post-attenuation. Laser output energy is measured and documented on a weekly basis and adjustments are made accordingly to compensate for fading laser energy over time.

***Assigning peptide sequences.*** A set of peptides previously selected on the basis of statistical differences in ion intensity between cancers and control groups was analyzed by MALDI-TOF/TOF tandem mass spectrometry, using an UltraFlex TOF/TOF instrument (Bruker) operated in 'LIFT' mode. The mono-isotopic masses were first assigned by one-dimensional reflectron-TOF MS, in the presence of three peptide calibrants (6 fmoles each; calculated monoisotopic masses of 2,108.155 Da, 1,307.762 Da and 969.575 Da in the protonated form), as described (2). Spectra were obtained by averaging multiple signals; laser irradiance and number of acquisitions (typically 100-150) were operator adjusted to yield maximal peak deflections derived from the digitizer in real time. Mono-isotopic masses were assigned for all selected and other prominent

peaks after visual inspection, and the low- and high-end internal standards were used for recalibration. The pass/fail criterion for recalibration is a correct assignment of an  $m/z$  value for the 'middle' calibrant with a mass accuracy equal or better than 12 ppm. Alternatively, a QSTAR XL Hybrid quadrupole (Q) time-of-flight mass spectrometer (Applied Biosystems/MDS Sciex), equipped with an o-MALDI ion source, was used for both duplicate and additional tandem-MS analyses. By selecting precursor ions of interest in 'Q1' (operated in the mass-filter mode), mass measurements of fragment ions could be obtained in the TOF detector following collision-induced dissociation (CID) in 'Q2'. Typically, a mass window of 3 Da was selected in order to transmit the entire isotopic envelope of the precursor ion species. Collision energy was operator adjusted to yield maximum number and intensities of the fragment ions.

Fragment ion spectra resulting from TOF/TOF and Q/TOF analyses (300-1,000 acquisitions averaged per spectrum) were taken to search a "non-redundant" human database ('NCBIInr'; release data: 05-20-2005; 134,668 entries; National Center for Biotechnology Information) using the MASCOT MS/MS ion search program, version 2.0.04 for Windows (Matrix Science Ltd.), with the following search parameters: mono-isotopic precursor mass tolerance of 35 ppm, fragment mass tolerance of 0.5 Da, and without a specified protease cleavage site. Mascot 'mowse' scores greater than 35 were considered significant. Any identification thus obtained was verified independently by two different people by comparing the computer-generated fragment ion series of the predicted peptide with the experimental MS/MS data. Some sequence assignments had below-threshold scores but could nonetheless be unequivocally assigned as the

precursor ion mass and selected fragment ion masses (higher-intensity b” or y” ions resulting from preferential CID of Xaa-Pro and Asp/Glu-Xaa peptide bonds (3)) matched a particular peptide, representing a rung in one of the serum peptide sequence ladders (see Figure 5 and Supplementary Table 3).

**Signal processing.** *Setup:* Once acquired, all data are stored with a naming convention that allows each sample to be associated with its calibrant. The spectra are first converted from binary format to ASCII files containing two columns of data (x: m/z; y: intensity) by a custom written macro in FlexAnalysis (Bruker). For the lower mass range (700-4,000 Da), about 48,000 x,y-points were generated while for the upper mass range (4-15 kDa), there were about 77,000 points. Further data processing was done in MATLAB with a custom script called ‘Qcealign’ using only the ASCII versions of the raw spectra. ‘Qcealign’ used the ‘Qpeaks’ program (Spectrum Square Associates) for smoothing, baseline subtraction and peak labeling (4). The singletwidth parameter required by ‘Qpeaks’ was set to -400 for the lower mass range and -200 for the upper mass range, thereby specifying the resolution,  $(m/z)/\Delta(m/z)$ , for processing. Peak information was used automatically by ‘Qpeaks’ in setting the parameters for smoothing, baseline-subtraction, and binning. The noise statistics were assumed ‘Normal’.

*Processing:* Following parameter selection, a setup file is created. ‘Qcealign’ then queries the setup file to obtain a list of all the directories for processing. During a single processing run, all data files in all listed directories are aligned with each other. For each directory, singletwidth information is provided in the setup file, along with parameters controlling calibration, peak labeling sensitivity, alignment, etc. The files

containing the polypeptide standards are calibrated first. The centroid positions of peaks in these calibration files are obtained from the peak table created by 'Qpeaks', compared to the known polypeptide peak positions, and a quadratic calibration equation for correcting the measured masses in each calibration file is created. The calibration equations are saved to disk for use in calibrating the mass axes of the sample files. Next, 'Qcealign' creates a reference file to which all sample spectra will later be aligned. The first data file is loaded and calibrated by applying the curve calculated from its associated calibrant spectrum. This file's x-axis ( $m/z$ ) becomes the x-axis (and thus the calibration) used in the reference file. 'Qcealign' then loads all other sample files, calibrates them, and adds their intensities to the reference file's intensity. After all samples have been added, the reference spectrum becomes the average of all the sample files. The reference is processed with 'Qpeaks' to find a baseline, which is subtracted, and is then normalized to unit size by dividing each intensity value by the Total Ion Count (TIC). Once normalized, a scaling factor is added by multiplying each intensity value by a user-selected number (e.g.,  $10^7$ ). This scaling factor is constant within a data set and is used to convert the normalized spectrum to a "user friendly" scale, where most peak heights are greater than one. Next, 'Qcealign' processes each sample file with 'Qpeaks' to create a peak table, smoothed curve and a baseline. This spectrum is then taken for alignment.

*Alignment:* A custom alignment algorithm, 'Entropycal', aligns sample data files to a reference file using a minimum entropy algorithm by taking unsmoothed ('raw'), baseline-corrected data (4). Taking raw spectra for alignment facilitates the use of all

statistical information in the data; processed data contains less information. The alignment is performed in two steps: 'Entropycal' and binning. 'Entropycal' slides each data file by 'n' data points to the right or left along the x-axis of the reference file. At each relative position n, the Shannon entropy of the sum of the two files is computed. The optimal alignment occurs at the shift that produces the minimum Shannon entropy. Once aligned, the smoothed spectrum, which is produced as a byproduct of the 'Qpeaks' processing, is then updated to reflect the aligned m/z values and saved to disk after baseline-subtraction, normalization and scaling. The previously generated peak table is updated to reflect the baseline-subtraction, normalization, scaling and alignment. The peak lists are then binned by using the resolution of the peaks: all peaks in rows within  $\Delta(m/z)$  of the strongest peak at a given value of m/z are binned together, and a spreadsheet is created for further statistical analysis.

**MATLAB software tools.** Three software modules, developed in MATLAB, were used for visualization and signal processing of the spectra (4). (I) *Signal Processing & Preview (SPP)*, a graphical viewer for spectra in ASCII format, allows plotting raw and processed spectra side-by-side to review the outcome of signal processing. Furthermore, parameters of 'Qpeaks' (the signal processing software) can be adjusted. (II) *Mass Spectra Viewer (MSV)*, a visual interface for processed spectral data, plots spectra as X-Y curves (mass vs. magnitude) for examining the signatures of several groups of samples. MSV supports regular browsing functions such as scroll, zoom, highlighting, etc. (III) *HeatMap (HM)* displays spectra as a 2D heat map images, in which the magnitude of the peaks are color-coded on a continuous scale. In addition



to browsing functions such as zoom and scroll, the rank of X- and Y- position coordinates can be reorganized without the constraints of statistical correlation that are enforced by most HeatMap commercial software packages.

## References

1. Villanueva, J., Philip, J., Entenberg, D., Chaparro, C.A., Tanwar, M.K., Holland, E.C., and Tempst, P. 2004. Serum peptide profiling by magnetic particle-assisted, automated sample processing and MALDI-TOF mass spectrometry. *Anal Chem* 76:1560-1570.
2. Winkler, G.S., Lacomis, L., Philip, J., Erdjument-Bromage, H., Svejstrup, J.Q., and Tempst, P. 2002. Isolation and mass spectrometry of transcription factor complexes. *Methods* 26:260-269.
3. Kapp, E.A., Schutz, F., Reid, G.E., Eddes, J.S., Moritz, R.L., O'Hair, R.A., Speed, T.P., and Simpson, R.J. 2003. Mining a tandem mass spectrometry database to determine the trends and global factors influencing peptide fragmentation. *Anal Chem* 75:6251-6264.
4. Villanueva, J., Philip, J., Chaparro, C.A., Li, Y., Toledo-Crow, R., DeNoyer, L., Fleisher, M., Robbins, R.J., and Tempst, P. 2005. Correcting Common Errors in Identifying Cancer-Specific Serum Peptide Signatures. *J Proteome Res* 4:1060-1072.

**Supplementary Table 1.** *Age distribution, gender and clinical characteristics of 106*

*study samples used for serum peptide profiling.* All samples were collected, stored and handled at Memorial Sloan-Kettering Cancer Center following established protocol (Villanueva et al., 2005, J Proteome Res 4:1060-72). Abbreviations: PSA, prostate-specific antigen; LVI, lymphatic/vascular invasion; ER, estrogen receptor; PR, progesterone receptor; LN, lymph nodes; pT, pathologic stage.

**Supplementary Table 2.** *Data set of 68 selected biomarker m/z-peaks, derived from*

*MALDI-TOF MS serum peptide profiling of three groups of cancer patients and healthy controls.* The three sub-tables contain: (A) averages plus ( $\pm$ ) standard deviations, and medians (in brackets) of the intensities of each *m/z*-peak (i.e., serum peptide) within a particular data set derived from each of the three cancer patient groups and of the healthy controls. Intensities refer to normalized units that were calculated for each peak by dividing its raw intensity by the total of all the intensities in that spectrum (TIC – Total Ion Count). The resultant values were then multiplied by fixed scaling factor ( $1 \times 10^7$ ) to convert the data to a ‘user-friendly’ scale (i.e. most values  $\geq 1$ ). (B) Ratios were calculated by dividing the median normalized intensity of each *m/z*-peak in each cancer group by the median of the same *m/z*-peak in the control group. To avoid having to divide by zero, any median value of less than 1 was converted to 1; this was applied to all groups. Data for a second, independent validation set of prostate cancer samples is also listed. (C) False discovery rate adjusted p-values were calculated for each *m/z*-peak using the Mann-Whitney rank sum test (for binary comparisons) or the Kruskal-

Wallis test (for multi-class comparisons). The group of 68 *m/z*-peaks listed here were derived from the original peak list, containing normalized ion intensities (and medians within a group, case/control ratios and adjusted p-values) for each of the 651 *m/z*-peaks for each of the 106 samples, by applying p-value and median intensity cutoff filters ( $p < 0.00001$ ; median intensity  $\geq 500$  'units') to. Entries which passed both filters in one or more cancer groups are color-coded: prostate cancer (14; blue), breast cancer (14; red) and bladder cancer (58; green).

**Supplementary Table 3.** *Total number of serum peptide sequences obtained in the course of current study.* Sequences are organized per overlapping cluster; and clusters are organized per precursor protein (NCBI ID nos. are given). Positions in the precursor proteins are indicated. Residues between brackets were not observed but are listed here to indicate the putative primary cleavage sites by endoproteases. Additional information is given, as for instance the relative position of adjacently located peptides or peptide clusters, identity of previously known serum peptides (e.g., FPA, C3f), position of propeptides, and location of C-termini (C-t). Key: Met<sub>ox</sub> or M<sub>ox</sub>, oxidized methionine; Pro<sub>hydroxyl</sub>, hydroxylated proline.

**Supplementary Table 4.** *Locations of sequenced serum peptides in the precursor proteins.* NCBI ID nos. are given, as well as the positions of known, processed serum proteins, peptides and propeptides. The peptide sequences obtained in the current study are shown in bold and are underlined.

**Supplementary Figure 1.** *MALDI-TOF mass spectral overlays of selected peaks*

*derived from serum peptide profiling of three groups of cancer patients, and male and female healthy controls.* Spectra were obtained, aligned and normalized as described in the 'Methods' section, and are displayed using the Mass Spectra Viewer (MSV).

Peptide-ions have been selected to illustrate cancer-specific differences of normalized intensities compared to controls. The nine overlays (not to scale) each show a binary comparison for all spectra from either the bladder cancer ( $n=20$ ; green), or prostate cancer ( $n=32$ ; blue) or breast cancer patient group ( $n=21$ ; red) versus male control ( $n=14$ ; black) and female control groups ( $n=19$ ; yellow). The mono-isotopic mass ( $m/z$ ) is shown for each peptide-ion peak.

**TABLE S1: Study set of cancer patients and healthy controls (Villanueva et al.)**

**A. PROSTATE CANCER**

| n = 32                             |                          |                       |                           |      | n = 41                             |                          |                       |                           |       |
|------------------------------------|--------------------------|-----------------------|---------------------------|------|------------------------------------|--------------------------|-----------------------|---------------------------|-------|
| TRAINING SET                       |                          |                       |                           |      | VALIDATION SET                     |                          |                       |                           |       |
| All Hormone-Refractory Chemo-Naïve | Age when Blood was Drawn | Highest MSKCC Gleason | PSA at time of Blood Draw |      | All Hormone-Refractory Chemo-Naïve | Age when Blood was Drawn | Highest MSKCC Gleason | PSA at time of Blood Draw |       |
| <b>Average:</b>                    |                          |                       |                           |      | <b>Average:</b>                    |                          |                       |                           |       |
| Age                                | 66                       | 51                    | 7                         | 214  | Age                                | 67                       | 52                    | 9                         | 247   |
| Gleason                            | 7.7                      | 56                    | 8                         | 51   | Gleason                            | 7.9                      | 53                    | 10                        | 51    |
| PSA                                | 232                      | 57                    | 10                        | 1380 | PSA                                | 400                      | 54                    | 7                         | 5     |
|                                    |                          | 57                    | 7                         | 95   |                                    |                          | 57                    | None                      | 538   |
|                                    |                          | 58                    | 8                         | 119  |                                    |                          | 58                    | 9                         | 18    |
|                                    |                          | 58                    | 9                         | 585  |                                    |                          | 59                    | 9                         | 29    |
| <b>Median:</b>                     |                          | 59                    | 6                         | 94   | <b>Median:</b>                     |                          | 61                    | 8                         | 821   |
| Age                                | 66                       | 60                    | 8                         | 74   | Age                                | 67                       | 61                    | 8                         | 22    |
| Gleason                            | 8                        | 60                    | 9                         | 10   | Gleason                            | 8                        | 62                    | 7                         | 329   |
| PSA                                | 66                       | 61                    | 9                         | 232  | PSA                                | 133                      | 62                    | 8                         | 55    |
|                                    |                          | 62                    | 6                         | 21   |                                    |                          | 63                    | None                      | 89    |
|                                    |                          | 62                    | 8                         | 417  |                                    |                          | 63                    | 9                         | 15    |
|                                    |                          | 63                    | 7                         | 24   |                                    |                          | 63                    | 8                         | 775   |
|                                    |                          | 64                    | 7                         | 495  |                                    |                          | 64                    | 8                         | 26    |
|                                    |                          | 64                    | None                      | 44   |                                    |                          | 65                    | 8                         | 51    |
|                                    |                          | 64                    | None                      | 68   |                                    |                          | 65                    | 7                         | 622   |
|                                    |                          | 67                    | 7                         | 25   |                                    |                          | 65                    | 7                         | 75    |
|                                    |                          | 67                    | 9                         | 11   |                                    |                          | 66                    | 7                         | 531   |
|                                    |                          | 67                    | None                      | 0.31 |                                    |                          | 66                    | 6                         | 1845  |
|                                    |                          | 68                    | 6                         | 8    |                                    |                          | 67                    | 7                         | 138.8 |
|                                    |                          | 70                    | None                      | 48   |                                    |                          | 67                    | 9                         | 87    |
|                                    |                          | 70                    | 7                         | 25   |                                    |                          | 68                    | 7                         | 417   |
|                                    |                          | 71                    | 7                         | 305  |                                    |                          | 68                    | 8                         | 87    |
|                                    |                          | 71                    | 8                         | 650  |                                    |                          | 68                    | 7                         | 1737  |
|                                    |                          | 72                    | None                      | 63   |                                    |                          | 69                    | 8                         | 603   |
|                                    |                          | 73                    | 6                         | 43   |                                    |                          | 69                    | 8                         | 1113  |
|                                    |                          | 73                    | 9                         | 42   |                                    |                          | 69                    | 7                         | 428   |
|                                    |                          | 75                    | 7                         | 21   |                                    |                          | 69                    | 8                         | 18    |
|                                    |                          | 75                    | 8                         | 796  |                                    |                          | 70                    | 9                         | 133   |
|                                    |                          | 77                    | 8                         | 50   |                                    |                          | 71                    | 8                         | 24    |
|                                    |                          | 78                    | None                      | 1283 |                                    |                          | 71                    | None                      | 369   |
|                                    |                          | 81                    | 8                         | 131  |                                    |                          | 73                    | 10                        | 91    |
|                                    |                          |                       |                           |      |                                    |                          | 73                    | 8                         | 23.08 |
|                                    |                          |                       |                           |      |                                    |                          | 75                    | 8                         | 255   |
|                                    |                          |                       |                           |      |                                    |                          | 76                    | 7                         | 252   |
|                                    |                          |                       |                           |      |                                    |                          | 76                    | 9                         | 24    |
|                                    |                          |                       |                           |      |                                    |                          | 77                    | 9                         | 249   |
|                                    |                          |                       |                           |      |                                    |                          | 77                    | 7                         | 58    |
|                                    |                          |                       |                           |      |                                    |                          | 80                    | 7                         | 1715  |
|                                    |                          |                       |                           |      |                                    |                          | 80                    | 7                         | 131   |
|                                    |                          |                       |                           |      |                                    |                          | 81                    | 8                         | 2298  |

**B. BREAST CANCER**

| n = 21          |      |               |           |              |               |        |     |     |       |         |
|-----------------|------|---------------|-----------|--------------|---------------|--------|-----|-----|-------|---------|
|                 | AGE  | INVASIVE TYPE | SIZE (cm) | HISTOL GRADE | NUCLEAR GRADE | LVI    | ER  | PR  | Her-2 | LN      |
| <b>Average:</b> |      |               |           |              |               |        |     |     |       |         |
| Age             | 51.6 | 28            | DUCT/MUC  | 3.5          | 3             | ?      | 90  | 0   | 0     | neg     |
| Size (cm)       | 1.4  | 35            | NONE      | NA           | na            | na     | na  | na  | na    | neg     |
|                 |      | 40            | DUCT      | 0.6 MAX      | 3             | Y, ext | 0   | 0   | 1     |         |
|                 |      | 40            | DUCT      | 1.2          | 3             | sus    | 90  | 80  | 1+    | neg     |
|                 |      | 42            | DUCT      | 2.5          | 3             | Y      | 100 | 30  | 2+    | +       |
|                 |      | 43            | DUCT      | 1.6          | 1 to 2        | no     | 60  | 100 | 1+    | neg     |
| <b>Median:</b>  |      | 47            | DUCT      | 1            | 2             | no     | 100 | 90  | 1+    | neg     |
| Age             | 49   | 47            | DUCT      | 2.1          | 3             | no     | 90  | 50  | 0     | neg     |
| Size (cm)       | 1.3  | 48            | DUCT      | 1.1          | 2             | no     | 90  | 60  | 1+    | neg     |
|                 |      | 49            | LOB       | 1.3          | na            | no     | 60  | 60  | 1     | neg     |
|                 |      | 49            | DUCT      | 0.85         | 3             | no     | 95  | <5  | 1+    | neg     |
|                 |      | 51            | DUCT      | 1.4          | 3             | no     | 0   | 0   | 0     | 2 of 26 |
|                 |      | 53            | DUCT      | 0.5          | 3             | no     | 100 | 100 | 1+    | neg     |
|                 |      | 54            | TUB/LOB   | 0.9          | 2             | NO     | 90  | 90  | 0     | 2       |

|    |      |     |        |   |     |     |    |          |          |
|----|------|-----|--------|---|-----|-----|----|----------|----------|
| 55 | DUCT | 1.5 | 3      | 2 | ?   | 60  | 80 | 0        | neg      |
| 56 | DUCT | 2   | 3      | 2 | yes | 100 | 40 | 0        | neg      |
| 61 | DUCT | 0.9 | 3      | 2 | NO  | 95  | 5  | 1        | neg      |
| 67 | DUCT | 1.9 | 2 to 3 | 2 | NO  | 0   | 0  | 1        | neg      |
| 68 | DUCT | 0.5 | 2 to 3 | 2 | NO  | 100 | <5 | 1+       | micromet |
| 72 | DUCT | 1.7 | 3      | 3 | NO  | 0   | 0  | 2 (ampl) | neg      |
| 79 | DUCT | 1.1 | 3      | 2 | no  | 75  | 25 | 1+       | neg      |

### C. BLADDER CANCER

n = 20

|                 |      | AGE | SEX | STAGE | GRADE | Vascular invasion |
|-----------------|------|-----|-----|-------|-------|-------------------|
| <b>Average:</b> |      | 49  | M   | pT1   | High  | No                |
| Age             | 66.1 | 50  | M   | pT4   | High  | Yes               |
|                 |      | 52  | M   | pTIS  | High  | No                |
| <b>Median:</b>  |      | 53  | F   | pTIS  | High  | No                |
| Age             | 67   | 58  | M   | pT3B  | High  | Yes               |
|                 |      | 60  | M   | pT1   | High  | Yes               |
|                 |      | 62  | M   | pTA   | High  | No                |
|                 |      | 63  | M   | pTIS  | High  | No                |
|                 |      | 64  | M   | pT3A  | High  | No                |
|                 |      | 67  | M   | pTA   | Low   | No                |
|                 |      | 67  | M   | pT3B  | High  | Yes               |
|                 |      | 70  | M   | pTA   | Low   | No                |
|                 |      | 71  | M   | pTA   | High  | No                |
|                 |      | 74  | F   | pT3B  | High  | Yes               |
|                 |      | 74  | M   | pT1   | High  | No                |
|                 |      | 75  | M   | pTIS  | Low   | No                |
|                 |      | 75  | M   | pT1   | High  | No                |
|                 |      | 79  | M   | pTIS  | High  | No                |
|                 |      | 79  | M   | pTA   | Low   | No                |
|                 |      | 80  | M   | pTIS  | High  | No                |

### D. NON-CANCER CONTROLS

n=33

|                 |      | AGE | SEX |
|-----------------|------|-----|-----|
| <b>Average:</b> |      | 23  | F   |
| Age             | 34.9 | 23  | F   |
|                 |      | 23  | M   |
| <b>Median:</b>  |      | 24  | M   |
| Age             | 31   | 25  | F   |
|                 |      | 25  | M   |
|                 |      | 25  | M   |
|                 |      | 26  | F   |
|                 |      | 26  | F   |
|                 |      | 27  | F   |
|                 |      | 27  | F   |
|                 |      | 27  | M   |
|                 |      | 28  | M   |
|                 |      | 29  | F   |
|                 |      | 30  | F   |
|                 |      | 31  | F   |
|                 |      | 31  | M   |
|                 |      | 32  | M   |
|                 |      | 34  | F   |
|                 |      | 35  | M   |
|                 |      | 39  | F   |
|                 |      | 40  | F   |
|                 |      | 42  | F   |
|                 |      | 42  | F   |
|                 |      | 43  | M   |
|                 |      | 44  | F   |
|                 |      | 46  | M   |
|                 |      | 47  | F   |
|                 |      | 48  | F   |
|                 |      | 51  | F   |
|                 |      | 51  | M   |
|                 |      | 52  | M   |
|                 |      | 56  | M   |

Table S2: Feature selection (Villanueva *et al.*)

A

Binary Comparisons Mean ± STD (Median)

| M/Z-value | Prostate (14)                | Breast (14)                  | Bladder (58)                 | Controls                    |
|-----------|------------------------------|------------------------------|------------------------------|-----------------------------|
| 823       | 252.99 ± 173.92, (204.02)    | 160.11 ± 69.57, (135.22)     | 1064.54 ± 726.55, (829.12)   | 195.36 ± 80.69, (177.91)    |
| 830       | 254.8 ± 166.72, (233.97)     | 143.99 ± 43.67, (142.23)     | 1156.92 ± 703.1, (1243.67)   | 176.1 ± 127.5, (149.42)     |
| 890       | 594.67 ± 338.63, (543.63)    | 309.71 ± 123.02, (280.38)    | 778.16 ± 225.79, (752.41)    | 404.31 ± 117.45, (371.2)    |
| 906       | 4561.2 ± 1727.3, (4511.86)   | 7338.56 ± 2182.97, (6910.05) | 3272.39 ± 767.81, (3381.28)  | 4369.04 ± 539.06, (4265.11) |
| 944       | 1161.36 ± 752.6, (943.64)    | 332.25 ± 102.72, (313.79)    | 2817.62 ± 707.49, (2808.31)  | 643.38 ± 420.99, (542)      |
| 1022      | 1581.47 ± 1259.27, (1121.19) | 2769.8 ± 1905.14, (1894)     | 1207.52 ± 762.91, (1116.83)  | 4016.7 ± 464.05, (4018.76)  |
| 1046      | 444.12 ± 245.1, (371.99)     | 763.89 ± 221.41, (743.79)    | 155.23 ± 151.88, (160.86)    | 1002.57 ± 279.33, (894.87)  |
| 1057      | 274.25 ± 299.72, (226.73)    | 181.78 ± 247.01, (1)         | 939.21 ± 493.65, (1050.72)   | 25.32 ± 61.91, (1)          |
| 1062      | 2911.33 ± 1457.22, (3074.48) | 8192.98 ± 2705.77, (7566.57) | 1746.85 ± 958.92, (1694.1)   | 4216.94 ± 790.82, (3972.51) |
| 1079      | 1880.88 ± 1044.4, (2014.18)  | 3688.8 ± 1709.02, (3515.63)  | 1909.45 ± 528.38, (1833.42)  | 3664.76 ± 401.86, (3702.34) |
| 1100      | 438.06 ± 226.06, (362.24)    | 186.9 ± 89.59, (204.22)      | 600.4 ± 292.61, (581)        | 254.91 ± 72.11, (253.33)    |
| 1125      | 252.64 ± 146.67, (214.62)    | 477.82 ± 166.46, (445.61)    | 115.07 ± 77.82, (128.27)     | 521.36 ± 195.04, (515.14)   |
| 1209      | 2259.24 ± 1661.17, (2267.99) | 3437.89 ± 2294.84, (3107.73) | 2171.06 ± 864.61, (1970.59)  | 4558.92 ± 641.12, (4517.21) |
| 1214      | 1460.59 ± 1300.61, (1391.49) | 205.32 ± 398.04, (1)         | 2038.25 ± 989.02, (1912.04)  | 483.85 ± 741.93, (177.1)    |
| 1231      | 142.29 ± 127.3, (162.25)     | 177.67 ± 111.17, (222.86)    | 967.3 ± 495, (1016.21)       | 173.62 ± 133.9, (179.55)    |
| 1266      | 908.3 ± 670.36, (638.46)     | 1200.4 ± 1082.93, (755.41)   | 988.66 ± 727.44, (785.8)     | 3187.09 ± 640.76, (3271.91) |
| 1280      | 315.68 ± 237.5, (251.92)     | 84.09 ± 166.11, (1)          | 1446.41 ± 708.12, (1406.33)  | 73.44 ± 278.74, (1)         |
| 1313      | 106.62 ± 251.67, (1)         | 36.1 ± 77.88, (1)            | 715.63 ± 501.13, (634.96)    | 38.84 ± 129.6, (1)          |
| 1353      | 2080.48 ± 1235.52, (2102.44) | 2153.51 ± 1680.56, (1571.81) | 2107.42 ± 835.37, (2086.29)  | 4545.13 ± 463.86, (4496.6)  |
| 1383      | 145.8 ± 87.14, (164.77)      | 781.38 ± 358.17, (795.73)    | 192.51 ± 178.45, (151.76)    | 173.54 ± 76.32, (183.51)    |
| 1426      | 193.04 ± 195.89, (174.45)    | 277.17 ± 80.82, (286.87)     | 1103.34 ± 806.59, (840.46)   | 320.38 ± 250.78, (261.41)   |
| 1453      | 2159.29 ± 1380.63, (1885.15) | 390.67 ± 177.43, (437.78)    | 2751.62 ± 1140.1, (2646.51)  | 565.13 ± 755.93, (1)        |
| 1468      | 3240.55 ± 1805.38, (3378.1)  | 3949.53 ± 2241.27, (4081.59) | 2915.25 ± 948.24, (2834.33)  | 5117.08 ± 720.94, (5133.73) |
| 1502      | 100.31 ± 147.84, (1)         | 67.74 ± 113.81, (1)          | 831.64 ± 535, (809.48)       | 29.71 ± 81.34, (1)          |
| 1522      | 688.1 ± 334.43, (598.26)     | 1047.44 ± 452.72, (911.47)   | 269.71 ± 299.37, (242.68)    | 1465.61 ± 330.44, (1583.23) |
| 1534      | 888.53 ± 546.08, (768.39)    | 944.93 ± 726.19, (746)       | 1915.21 ± 742.33, (2058.15)  | 866.59 ± 492.35, (788.51)   |
| 1540      | 511.92 ± 415.35, (568.44)    | 548.63 ± 337.96, (526.19)    | 63.06 ± 247.7, (1)           | 904.68 ± 283.76, (979.16)   |
| 1566      | 866.76 ± 701.1, (620.9)      | 448.06 ± 107.93, (424.35)    | 1121.01 ± 631.83, (892.96)   | 769.93 ± 167, (788.67)      |
| 1619      | 494.63 ± 434.51, (345.33)    | 411.56 ± 270.5, (308.13)     | 183.73 ± 118.29, (179.97)    | 565.78 ± 195.43, (533.41)   |
| 1630      | 284.69 ± 140.7, (298.72)     | 810.04 ± 377.15, (764.04)    | 318.86 ± 183.28, (240.99)    | 249.83 ± 113.53, (274.41)   |
| 1694      | 1190.9 ± 1175.42, (795.86)   | 158.28 ± 125, (197.94)       | 1801.44 ± 1248.81, (1346.59) | 264.99 ± 200.67, (196.44)   |
| 1743      | 868.29 ± 507.68, (764.05)    | 2528.75 ± 1182.77, (2817.04) | 904.21 ± 659.21, (669.96)    | 985.98 ± 272.35, (1020.07)  |
| 1757      | 175.76 ± 150.02, (199.37)    | 139.54 ± 140.04, (149.67)    | 660.76 ± 269.38, (625.98)    | 90.96 ± 76.14, (109.77)     |
| 1782      | 1755.48 ± 1517.47, (1015.47) | 206.3 ± 110.37, (222.49)     | 2209.42 ± 1326.83, (1789.4)  | 348.39 ± 261.82, (232.33)   |
| 1868      | 3335.21 ± 1759.63, (2660.63) | 444.93 ± 164.29, (369.54)    | 3975.98 ± 897.39, (4057.03)  | 1387.84 ± 932.62, (1219.19) |
| 1899      | 1159.19 ± 551.08, (1042.22)  | 2549.48 ± 1183.38, (2415.09) | 2569.25 ± 761.88, (2732.08)  | 817.45 ± 243.86, (819.5)    |
| 1931      | 182.49 ± 219.7, (78.66)      | 6.36 ± 29.14, (1)            | 694.31 ± 390.38, (671.27)    | 40.47 ± 95.75, (1)          |
| 1975      | 45.77 ± 110.64, (1)          | 56.5 ± 85.43, (1)            | 749.54 ± 588.68, (640.68)    | 31.52 ± 79, (1)             |
| 1981      | 465.51 ± 303.8, (401.9)      | 253.16 ± 94.16, (252.61)     | 509.78 ± 192.1, (503.42)     | 280.44 ± 83.61, (291.52)    |
| 2119      | 423.08 ± 416.02, (307.12)    | 938.9 ± 524.4, (1011.77)     | 1196.66 ± 694.48, (1166)     | 104.39 ± 139.48, (95.37)    |
| 2145      | 147.6 ± 116.77, (147.98)     | 175.22 ± 110.49, (164.93)    | 566.47 ± 246.56, (587.13)    | 88.45 ± 42.79, (85.25)      |
| 2189      | 444.65 ± 193.51, (399.04)    | 700.19 ± 340.28, (659.4)     | 442.72 ± 223.55, (418.33)    | 248.71 ± 72.2, (233.35)     |
| 2273      | 1179.54 ± 966.02, (810.1)    | 396.38 ± 501.88, (258.68)    | 578.94 ± 448.48, (467.27)    | 198.98 ± 126.21, (176.84)   |
| 2341      | 225.26 ± 140.74, (197.02)    | 235.01 ± 143.67, (236.19)    | 771.06 ± 852.04, (548.12)    | 118.8 ± 96.8, (112.58)      |
| 2358      | 179.83 ± 285.35, (99.81)     | 534.86 ± 312.47, (531.1)     | 75.2 ± 76.55, (72.58)        | 26.81 ± 49.77, (1)          |
| 2383      | 602.55 ± 380.24, (549.5)     | 628.11 ± 218.93, (600.55)    | 98.26 ± 72.59, (76.29)       | 329.12 ± 105.17, (350.32)   |
| 2414      | 207.25 ± 264.92, (96.71)     | 97.34 ± 70.28, (109.24)      | 1818.24 ± 1301.3, (2124.24)  | 84.07 ± 281.49, (1)         |
| 2513      | 215.6 ± 379.84, (160.91)     | 854.57 ± 405.59, (928.01)    | 151.76 ± 74.32, (140.08)     | 102.04 ± 60.83, (116.58)    |
| 2570      | 63.36 ± 287.03, (1)          | 0 ± 0, (1)                   | 960.6 ± 826.63, (901.87)     | 54.15 ± 259.92, (1)         |
| 2615      | 565.34 ± 322.95, (476.37)    | 686.64 ± 335.04, (792.37)    | 389.77 ± 315.07, (385.25)    | 182.64 ± 73.01, (167.56)    |
| 2729      | 310.64 ± 437.03, (162.51)    | 152.86 ± 60.24, (152.26)     | 530.95 ± 268.79, (573.43)    | 109.58 ± 77.01, (92.98)     |
| 2760      | 162.39 ± 302.21, (98.96)     | 83.07 ± 70.13, (109.19)      | 1333.1 ± 1073.2, (1104.71)   | 107.96 ± 178.88, (89.45)    |
| 2773      | 1374.94 ± 769.55, (1402.29)  | 1729.28 ± 915.47, (1767.74)  | 230.77 ± 460.16, (57.11)     | 1844.05 ± 626.78, (1810.76) |
| 2937      | 2849.34 ± 1600.28, (3138.65) | 2460.84 ± 1085.04, (2461.74) | 449 ± 566.03, (327.68)       | 2535.87 ± 532.94, (2536.62) |
| 3162      | 490.75 ± 219.94, (460.99)    | 218.04 ± 232.1, (178.22)     | 1378.69 ± 774.81, (1435.63)  | 146.55 ± 76.97, (134.48)    |
| 3188      | 185.07 ± 351.68, (96.45)     | 116.96 ± 71.53, (130.31)     | 994.5 ± 724.4, (814.41)      | 146.72 ± 110.92, (130.05)   |
| 3195      | 1230.27 ± 914.13, (1140.9)   | 1968.93 ± 882.4, (2048.72)   | 163.96 ± 352.72, (1)         | 2238.86 ± 540.43, (2188.87) |
| 3267      | 1694.49 ± 1337.71, (1340.86) | 3845.22 ± 1607.33, (3737.23) | 363.36 ± 435.27, (308.7)     | 4053.35 ± 608.94, (4055.38) |
| 3278      | 241 ± 545.8, (1)             | 109.86 ± 331.01, (1)         | 1187.65 ± 600.05, (1277)     | 35.09 ± 153.42, (1)         |
| 3960      | 1089.65 ± 699.43, (905.2)    | 693.97 ± 377.07, (590.35)    | 1740.34 ± 956.75, (1677.38)  | 694.26 ± 210.11, (682.01)   |
| 3976      | 92.08 ± 242.92, (1)          | 274.17 ± 624.47, (1)         | 1142.42 ± 880.3, (957.31)    | 81.4 ± 165.25, (1)          |
| 4197      | 885.71 ± 594.73, (876.96)    | 1599.54 ± 367.22, (1684.09)  | 68.51 ± 256.55, (1)          | 1384.26 ± 345.28, (1260.57) |
| 4270      | 815.44 ± 772.4, (661.24)     | 461.83 ± 1014.05, (205.45)   | 2619.7 ± 1488.91, (2851.85)  | 268.04 ± 572.24, (1)        |
| 4631      | 950.45 ± 378.46, (819.99)    | 994.7 ± 271.21, (986.77)     | 664.56 ± 335.09, (747.07)    | 1191.67 ± 292.57, (1194.98) |
| 4990      | 188.71 ± 488.44, (1)         | 0 ± 0, (1)                   | 828.21 ± 487.82, (739.13)    | 41.29 ± 139.31, (1)         |
| 5052      | 431.3 ± 291.5, (440.99)      | 547.41 ± 189.68, (524.93)    | 229.54 ± 409.22, (1)         | 606.09 ± 264.85, (571.51)   |
| 5888      | 1054.81 ± 627.53, (1017.01)  | 2596.05 ± 1033.3, (2365.27)  | 243.27 ± 400.35, (146.37)    | 1850.13 ± 522.29, (1871.1)  |
| 9265      | 880.23 ± 381.87, (736.72)    | 1376.35 ± 358.29, (1379.52)  | 613.52 ± 282.95, (612.02)    | 1230.99 ± 312.11, (1224.81) |

B

| Ratio: Group/Control |          |        |         |           |
|----------------------|----------|--------|---------|-----------|
| M/Z                  | Prostate | Breast | Bladder | Prostate2 |
| 823                  | 1.15     | 0.76   | 4.66    | 0.52      |
| 830                  | 1.57     | 0.95   | 8.32    | 0.58      |
| 890                  | 1.46     | 0.76   | 2.03    | 1.03      |
| 906                  | 1.06     | 1.62   | 0.79    | 2.09      |
| 944                  | 1.74     | 0.58   | 5.18    | 2.01      |
| 1022                 | 0.28     | 0.47   | 0.28    | 0.15      |
| 1046                 | 0.42     | 0.83   | 0.18    | 0.40      |
| 1057                 | 226.73   | 1.00   | 1050.72 | 191.06    |
| 1062                 | 0.77     | 1.90   | 0.43    | 1.16      |
| 1079                 | 0.54     | 0.95   | 0.50    | 0.59      |
| 1100                 | 1.43     | 0.81   | 2.29    | 0.99      |
| 1125                 | 0.42     | 0.87   | 0.25    | 0.28      |
| 1209                 | 0.50     | 0.69   | 0.44    | 0.19      |
| 1214                 | 7.86     | 0.01   | 10.80   | 7.39      |
| 1231                 | 0.90     | 1.24   | 5.66    | 0.33      |
| 1266                 | 0.20     | 0.23   | 0.24    | 0.11      |
| 1280                 | 251.92   | 1.00   | 1406.33 | 231.96    |
| 1313                 | 1.00     | 1.00   | 634.96  | 21.25     |
| 1353                 | 0.47     | 0.35   | 0.46    | 0.25      |
| 1383                 | 0.90     | 4.34   | 0.83    | 0.42      |
| 1426                 | 0.67     | 1.10   | 3.22    | 0.40      |
| 1453                 | 1885.15  | 437.78 | 2646.51 | 2217.87   |
| 1468                 | 0.66     | 0.80   | 0.55    | 0.33      |
| 1502                 | 1.00     | 1.00   | 809.48  | 98.91     |
| 1522                 | 0.38     | 0.58   | 0.15    | 0.33      |
| 1534                 | 0.97     | 0.95   | 2.61    | 0.73      |
| 1540                 | 0.58     | 0.54   | 0.00    | 0.31      |
| 1566                 | 0.79     | 0.54   | 1.13    | 0.60      |
| 1619                 | 0.65     | 0.58   | 0.34    | 0.55      |
| 1630                 | 1.09     | 2.78   | 0.88    | 0.89      |
| 1694                 | 4.05     | 1.01   | 6.85    | 4.92      |
| 1743                 | 0.75     | 2.76   | 0.66    | 1.23      |
| 1757                 | 1.82     | 1.36   | 5.70    | 1.34      |
| 1782                 | 4.37     | 0.96   | 7.70    | 6.79      |
| 1868                 | 2.18     | 0.30   | 3.33    | 3.89      |
| 1899                 | 1.27     | 2.95   | 3.33    | 1.97      |
| 1931                 | 78.66    | 1.00   | 671.27  | 158.45    |
| 1975                 | 1.00     | 1.00   | 640.68  | 52.59     |
| 1981                 | 1.38     | 0.87   | 1.73    | 1.52      |
| 2119                 | 3.22     | 10.61  | 12.23   | 2.84      |
| 2145                 | 1.74     | 1.93   | 6.89    | 1.28      |
| 2189                 | 1.71     | 2.83   | 1.79    | 2.17      |
| 2273                 | 4.58     | 1.46   | 2.64    | 6.30      |
| 2341                 | 1.75     | 2.10   | 4.87    | 1.58      |
| 2358                 | 99.81    | 531.10 | 72.58   | 112.76    |
| 2383                 | 1.57     | 1.71   | 0.22    | 3.46      |
| 2414                 | 96.71    | 109.24 | 2124.24 | 64.14     |
| 2513                 | 1.38     | 7.96   | 1.20    | 1.69      |
| 2570                 | 1.00     | 1.00   | 901.87  | 170.85    |
| 2615                 | 2.84     | 4.73   | 2.30    | 5.86      |
| 2729                 | 1.75     | 1.64   | 6.17    | 3.64      |
| 2760                 | 1.11     | 1.22   | 12.35   | 5.42      |
| 2773                 | 0.77     | 0.98   | 0.03    | 1.61      |
| 2937                 | 1.24     | 0.97   | 0.13    | 2.32      |
| 3162                 | 3.43     | 1.33   | 10.68   | 4.23      |
| 3188                 | 0.74     | 1.00   | 6.26    | 0.01      |
| 3195                 | 0.52     | 0.94   | 0.00    | 0.94      |
| 3267                 | 0.33     | 0.92   | 0.08    | 0.74      |
| 3278                 | 1.00     | 1.00   | 1277.00 | 399.45    |
| 3960                 | 1.33     | 0.87   | 2.46    | 1.88      |
| 3976                 | 1.00     | 1.00   | 957.31  | 302.46    |
| 4197                 | 0.70     | 1.34   | 0.00    | 1.51      |
| 4270                 | 661.24   | 205.45 | 2851.85 | 753.39    |
| 4631                 | 0.69     | 0.83   | 0.63    | 1.45      |
| 4990                 | 1.00     | 1.00   | 739.13  | 63.32     |
| 5052                 | 0.77     | 0.92   | 0.00    | 0.84      |
| 5888                 | 0.54     | 1.26   | 0.08    | 1.48      |
| 9265                 | 0.60     | 1.13   | 0.50    | 1.72      |



C

| p-value |          |          |          |           |            |
|---------|----------|----------|----------|-----------|------------|
| M/Z     | Prostate | Breast   | Bladder  | Prostate2 | Multiclass |
| 823     | 0.11     | 7.42E-03 | 1.30E-12 | 3.27E-06  | 3.24E-15   |
| 830     | 2.53E-05 | 0.558    | 1.06E-09 | 1.21E-04  | 1.85E-15   |
| 890     | 1.55E-04 | 9.54E-03 | 8.72E-10 | 0.808     | 1.64E-14   |
| 906     | 0.593    | 7.39E-10 | 3.12E-07 | 5.68E-07  | 3.65E-14   |
| 944     | 1.01E-03 | 3.56E-05 | 7.65E-13 | 9.67E-06  | 6.77E-21   |
| 1022    | 1.34E-11 | 0.0323   | 2.80E-13 | 6.29E-13  | 1.67E-13   |
| 1046    | 2.20E-11 | 1.22E-03 | 1.80E-13 | 8.34E-05  | 9.04E-24   |
| 1057    | 5.29E-07 | 8.13E-03 | 1.80E-13 | 2.35E-09  | 1.22E-13   |
| 1062    | 4.89E-04 | 1.03E-11 | 1.03E-12 | 0.272     | 9.04E-24   |
| 1079    | 2.94E-11 | 0.683    | 7.65E-13 | 9.69E-05  | 1.97E-14   |
| 1100    | 2.96E-06 | 0.0356   | 5.55E-08 | 0.665     | 7.10E-15   |
| 1125    | 6.84E-08 | 0.676    | 7.65E-13 | 3.28E-04  | 3.51E-18   |
| 1209    | 4.18E-08 | 0.0654   | 1.30E-12 | 1.91E-10  | 1.31E-09   |
| 1214    | 8.63E-04 | 0.251    | 9.43E-08 | 4.13E-07  | 8.69E-11   |
| 1231    | 0.523    | 0.867    | 1.10E-10 | 0.02      | 9.53E-11   |
| 1266    | 6.48E-17 | 2.75E-07 | 1.05E-10 | 4.47E-20  | 2.74E-16   |
| 1280    | 4.81E-09 | 0.434    | 1.95E-13 | 5.19E-13  | 5.74E-20   |
| 1313    | 0.193    | 0.834    | 2.94E-11 | 6.81E-05  | 2.40E-12   |
| 1353    | 1.01E-15 | 4.82E-05 | 4.50E-13 | 6.26E-17  | 1.38E-14   |
| 1383    | 0.245    | 5.56E-13 | 0.506    | 3.29E-07  | 6.74E-13   |
| 1426    | 5.65E-05 | 0.901    | 8.63E-06 | 6.96E-11  | 8.37E-11   |
| 1453    | 6.86E-07 | 0.852    | 6.37E-10 | 1.40E-12  | 1.98E-14   |
| 1468    | 1.44E-05 | 0.128    | 1.25E-11 | 4.92E-08  | 1.88E-07   |
| 1502    | 0.0525   | 0.429    | 2.93E-15 | 1.71E-10  | 5.31E-15   |
| 1522    | 2.20E-11 | 1.04E-03 | 2.16E-12 | 1.76E-18  | 1.18E-19   |
| 1534    | 0.977    | 0.864    | 9.76E-06 | 0.513     | 1.33E-05   |
| 1540    | 1.08E-04 | 1.38E-04 | 2.52E-10 | 1.26E-11  | 5.10E-12   |
| 1566    | 0.46     | 6.15E-10 | 0.0904   | 2.90E-10  | 3.64E-08   |
| 1619    | 0.023    | 0.0178   | 1.05E-10 | 2.33E-04  | 4.80E-09   |
| 1630    | 0.288    | 6.69E-12 | 1        | 0.821     | 4.28E-10   |
| 1694    | 1.69E-04 | 0.4      | 8.73E-11 | 1.22E-15  | 4.77E-13   |
| 1743    | 0.0758   | 3.92E-06 | 0.129    | 0.0835    | 2.84E-08   |
| 1757    | 0.0103   | 0.389    | 4.50E-13 | 8.46E-04  | 9.48E-13   |
| 1782    | 5.29E-07 | 0.522    | 1.06E-09 | 1.18E-18  | 1.85E-15   |
| 1868    | 1.80E-05 | 1.39E-05 | 3.34E-11 | 1.18E-18  | 2.17E-19   |
| 1899    | 0.0153   | 1.04E-08 | 4.50E-13 | 6.05E-07  | 9.14E-17   |
| 1931    | 0.0241   | 0.12     | 6.60E-14 | 6.03E-09  | 1.47E-16   |
| 1975    | 0.989    | 0.424    | 4.10E-09 | 4.41E-07  | 1.89E-10   |
| 1981    | 2.15E-03 | 0.683    | 7.70E-06 | 1.03E-07  | 1.15E-07   |
| 2119    | 2.36E-07 | 8.19E-10 | 2.75E-11 | 6.62E-09  | 5.82E-18   |
| 2145    | 0.0189   | 5.27E-05 | 7.65E-13 | 0.131     | 3.45E-14   |
| 2189    | 6.59E-07 | 1.49E-08 | 2.21E-04 | 1.65E-07  | 9.87E-11   |
| 2273    | 7.63E-12 | 0.0981   | 5.29E-06 | 1.67E-13  | 3.08E-13   |
| 2341    | 3.07E-04 | 2.40E-04 | 1.05E-10 | 1.91E-04  | 1.18E-11   |
| 2358    | 3.68E-04 | 4.07E-12 | 4.39E-03 | 5.38E-12  | 8.65E-13   |
| 2383    | 4.37E-04 | 1.26E-07 | 1.25E-10 | 8.74E-11  | 1.54E-16   |
| 2414    | 8.82E-04 | 6.77E-03 | 3.52E-12 | 9.67E-06  | 7.39E-13   |
| 2513    | 0.0101   | 5.56E-13 | 0.0929   | 1.74E-05  | 5.60E-14   |
| 2570    | 0.532    | 0.105    | 2.81E-07 | 9.19E-10  | 4.26E-13   |
| 2615    | 1.43E-08 | 2.08E-07 | 0.0317   | 6.55E-19  | 6.60E-10   |
| 2729    | 5.99E-06 | 4.31E-04 | 4.48E-09 | 3.88E-11  | 9.52E-13   |
| 2760    | 0.605    | 0.533    | 1.95E-07 | 4.07E-08  | 3.06E-07   |
| 2773    | 0.0514   | 0.695    | 8.42E-11 | 2.30E-03  | 8.37E-11   |
| 2937    | 0.416    | 0.937    | 4.19E-11 | 4.55E-08  | 5.39E-09   |
| 3162    | 2.64E-12 | 0.198    | 7.04E-10 | 2.48E-15  | 1.74E-19   |
| 3188    | 0.0228   | 0.923    | 7.64E-09 | 7.31E-08  | 1.38E-09   |
| 3195    | 7.74E-07 | 0.499    | 1.95E-13 | 0.429     | 3.76E-17   |
| 3267    | 7.63E-12 | 0.875    | 1.82E-13 | 0.0218    | 6.77E-21   |
| 3278    | 0.0122   | 0.887    | 2.44E-14 | 2.65E-11  | 2.82E-14   |
| 3960    | 0.0514   | 0.546    | 1.48E-06 | 4.32E-07  | 4.78E-06   |
| 3976    | 1        | 0.29     | 5.98E-09 | 7.70E-08  | 2.68E-09   |
| 4197    | 5.73E-04 | 0.105    | 1.95E-13 | 4.14E-04  | 3.89E-16   |
| 4270    | 2.83E-04 | 0.276    | 4.92E-09 | 5.54E-07  | 1.36E-09   |
| 4631    | 3.58E-03 | 0.0323   | 3.33E-08 | 2.48E-03  | 4.27E-07   |
| 4990    | 0.288    | 0.322    | 5.15E-14 | 2.63E-06  | 5.90E-18   |
| 5052    | 8.63E-04 | 0.424    | 5.52E-08 | 0.0799    | 1.35E-08   |
| 5888    | 5.28E-06 | 0.0186   | 1.25E-11 | 0.0449    | 1.90E-19   |
| 9265    | 4.16E-04 | 0.256    | 2.03E-09 | 1.30E-04  | 1.71E-11   |

Table S3: Serum Peptide Identifications (Villanueva *et al.*)

| <i>m/z</i>                                                                               | MH+                         | $\Delta$ (Da) | AA sequence                         |
|------------------------------------------------------------------------------------------|-----------------------------|---------------|-------------------------------------|
| 1) Fibrinopeptide A (FPA); NCBI # 229185 – Fibrinogen alpha; NCBI # 4033511 (Res. 20–35) |                             |               |                                     |
| 758.45                                                                                   | 758.41 (0.04)               |               | LAEGGGVR                            |
| 905.50                                                                                   | 905.48 (0.02)               |               | FLAEGGGVR                           |
| 1020.47                                                                                  | 1020.51 (0.04)              |               | DFLAEGGGVR                          |
| 1077.53                                                                                  | 1077.53 (0.00)              |               | GDFLAEGGGVR                         |
| 1206.57                                                                                  | 1206.58 (0.01)              |               | EGDFLAEGGGVR                        |
| 1263.60                                                                                  | 1263.59 (0.01)              |               | GEEDFLAEGGGVR                       |
| 1350.64                                                                                  | 1350.63 (0.01)              |               | SGEGDFLAEGGGVR                      |
| 1465.65                                                                                  | 1465.65 (0.00)              |               | DSGEGDFLAEGGGVR                     |
| 1536.68                                                                                  | 1536.69 (0.01)              |               | ADSGEGDFLAEGGGVR                    |
| = FPA                                                                                    |                             |               |                                     |
| Fibrinogen alpha; NCBI # 4033511 (Res. 548–574 and 576–604, separated by K575; 605–629)  |                             |               |                                     |
| 2816.25                                                                                  | 2816.31 (0.06)              | (R)           | GSESGIFTNTKSSSHHPGIAEFPSRG (K)      |
| 2553.01                                                                                  | 2553.09 (0.08)              |               | (K) SSSYSKQFTSSTS SYNRGDSTFES       |
| 2768.26                                                                                  | 2768.22 (0.04)              |               | (K) SSSYSKQFTSSTS SYNRGDSTFESKS     |
| 2931.20                                                                                  | 2931.28 (0.08)              |               | (K) SSSYSKQFTSSTS SYNRGDSTFESKSY    |
| 3190.36                                                                                  | 3190.42 (0.06)              |               | (K) SSSYSKQFTSSTS SYNRGDSTFESKSYKM  |
| 3261.43                                                                                  | 3261.45 (0.02)              |               | (K) SSSYSKQFTSSTS SYNRGDSTFESKSYKMA |
| 2379.03                                                                                  | 2379.03 (0.00)              |               | .SSYSKQFTSSTS SYNRGDSTFE            |
| 3206.34                                                                                  | 3190.42[Met <sub>ox</sub> ] | = 3206.41     |                                     |
| 3277.39                                                                                  | 3261.45[Met <sub>ox</sub> ] | = 3277.44     |                                     |
| gsesgiftntkessshhpgiaefpsrgksssyskqftssts SYNRGDSTFESKSYKMA (548–604)                    |                             |               |                                     |
| 2659.03                                                                                  | 2659.24 (0.21)              |               | .....DEAGSEADHEGTHSTKRGHAKSRPV (R)  |
| 3239.22                                                                                  | 3239.51 (0.29)              |               | SYKMADEAGSEADHEGTHSTKRGHAKSRPV (R)  |

2) Complement C3f (C3f); NCBI #226159 – COMPLEMENT C3; NCBI # 68766 (Res. 1304–1320)

|         |                |                   |
|---------|----------------|-------------------|
| 942.43  | 942.47 (0.04)  | HWESASLL.         |
| 1055.60 | 1055.55 (0.05) | IHWESASLL.        |
| 1211.70 | 1211.65 (0.05) | RIHWESASLL.       |
| 1348.70 | 1348.71 (0.01) | HRIHWESASLL.      |
| 1449.76 | 1449.76 (0.00) | THRIHWESASLL.     |
| 1562.84 | 1562.84 (0.00) | ITRIHWESASLL.     |
| 1690.90 | 1690.93 (0.03) | KITHRIHWESASLL.   |
| 1777.93 | 1777.97 (0.04) | SKITHRIHWESASLL.  |
| 1864.95 | 1864.99 (0.04) | SSKITHRIHWESASLL. |
| 2021.06 | 2021.10 (0.04) | SSKITHRIHWESASLLR |
| 1751.88 | 1751.91 (0.03) | SSKITHRIHWESASL.. |

= C3f

3) Complement C4 precursor; NCBI # 20141171 -- all peptides map to C4-alpha  
(Res. 1337–1351 and 1353–1382, separated by R1352)

|         |                |                                  |
|---------|----------------|----------------------------------|
| 1498.91 | 1498.78 (0.13) | NGFKSHALQLNNR..                  |
| 1626.85 | 1626.84 (0.01) | NGFKSHALQLNNRQ.                  |
| 1739.93 | 1739.92 (0.01) | NGFKSHALQLNNRQI (R)              |
| 1895.99 | 1896.02 (0.03) | RNGFKSHALQLNNRQI (R)             |
| 1762.87 | 1762.92 (0.05) | (R) GLEELQFSLGSKINV              |
| 2305.20 | 2305.19 (0.01) | (R) GLEELQFSLGSKINVKVGNS         |
| 2704.13 | 2704.44 (0.31) | (R) GLEELQFSLGSKINVKVGNSKGTI     |
| 3200.52 | 3200.79 (0.27) | (R) GLEELQFSLGSKINVKVGNSKGTILKVL |

(Res. 957–979)

|         |                |                            |
|---------|----------------|----------------------------|
| 2551.06 | 2551.16 (0.10) | (R) TLEIPGNSDPNMIPDGFNSYVR |
|---------|----------------|----------------------------|

4) Inter-alpha-trypsin inhibitor heavy chain H4 (ITIH4); NCBI # 13432192

(Res. 650-688)

|         |         |        |                                            |
|---------|---------|--------|--------------------------------------------|
| 842.40  | 842.39  | (0.01) | HAAYHPF.                                   |
| 1786.86 | 1786.85 | (0.01) | GLPGPPDVPDHAAYHPF.                         |
| 2028.01 | 2027.99 | (0.02) | QLGLPGPPDVPDHAAYHPF.                       |
| 2271.14 | 2271.12 | (0.02) | SRQLGLPGPPDVPDHAAYHPF.                     |
| 2358.09 | 2358.15 | (0.06) | SSRQLGLPGPPDVPDHAAYHPF.                    |
| 2627.48 | 2627.34 | (0.14) | GVLSRQLGLPGPPDVPDHAAYHPF.                  |
| 2724.48 | 2724.38 | (0.10) | PGVLSRQLGLPGPPDVPDHAAYHPF.                 |
| 3272.50 | 3272.63 | (0.13) | MNFRPGVLSRQLGLPGPPDVPDHAAYHPF.             |
| 3970.97 | 3970.97 | (0.00) | (R) QAGAAGSRMNFRPGVLSRQLGLPGPPDVPDHAAYHPF. |
| 2183.91 | 2184.09 | (0.18) | QLGLPGPPDVPDHAAYHPFR                       |
| 998.45  | 998.49  | (0.04) | HAAYHPFR                                   |

(Res. 617-644)

|         |                |                                 |
|---------|----------------|---------------------------------|
| 3156.52 | 3156.61 (0.09) | (R) NVHSGSTFFKYYLQAKIPKPEASFSPR |
|---------|----------------|---------------------------------|

ITIH4 splice variant: PRO1851; NCBI # 7770149 (Res. 347-367)

|         |                |                               |
|---------|----------------|-------------------------------|
| 2115.01 | 2115.04 (0.03) | (R) NVHSAGAAGSRMNFPRGVLSS (R) |
|---------|----------------|-------------------------------|

|                                                                                              |                |     |                                                  |                        |
|----------------------------------------------------------------------------------------------|----------------|-----|--------------------------------------------------|------------------------|
| <b>5) Apolipoprotein A-I; NCBI # 4557321 (Res. 220-238 and 240-267, separated by R239)</b>   |                |     |                                                  |                        |
| 2052.89                                                                                      | 2053.07 (0.18) | (K) | ATEHLSTLSEKAKPALEDL (R)                          |                        |
| 3182.46                                                                                      | 3182.72 (0.26) | (R) | QGLLPVLESFKVSFLSALLEEYTKKLNTQ                    | C-t                    |
| 1971.16                                                                                      | 1971.04 (0.12) |     | VSFLSALLEEYTKKLNTQ                               | C-t                    |
| <b>(Res. 148-176)</b>                                                                        |                |     |                                                  |                        |
| 1807.78                                                                                      | 1807.92 (0.14) |     | ELQEGARQKLHELQE                                  |                        |
| 3377.45                                                                                      | 3377.71 (0.26) | (R) | AELQEGARQKLHELQEKLSPLGEEM <sub>ox</sub> RDRA (R) |                        |
| <b>6) Apolipoprotein A-IV; NCBI # 114006 (Res. 256-278 and 280-304, separated by K279)</b>   |                |     |                                                  |                        |
| 2508.16                                                                                      | 2508.35 (0.19) |     | ISASAEELRQRLAPLAEDVRGNL (K)                      |                        |
| 1771.81                                                                                      | 1771.84 (0.03) |     |                                                  | SLAELGGHLDQQVEEF.      |
| 2599.18                                                                                      | 2599.25 (0.07) | (K) | GNTEGLQKSLAELGGHLDQQVEEF.                        |                        |
| 2755.20                                                                                      | 2755.35 (0.15) | (K) | GNTEGLQKSLAELGGHLDQQVEEFR                        |                        |
| 1927.94                                                                                      | 1927.94 (0.00) |     |                                                  | SLAELGGHLDQQVEEFR      |
| <b>7) Apolipoprotein C-I; NCBI # 114016</b>                                                  |                |     |                                                  |                        |
| 2778.15                                                                                      | 2778.44 (0.29) |     | DVSSALDKLKEFGNTLEDKARELIS (R)                    |                        |
| <b>8) Apolipoprotein E; NCBI # 114039 (Res. 210-233)</b>                                     |                |     |                                                  |                        |
| 2267.07                                                                                      | 2267.18 (0.11) |     |                                                  | TVGSLAGQPLQERAQAWGERL. |
| 2409.13                                                                                      | 2409.26 (0.13) | (R) | AATVGSLAGQPLQERAQAWGERL.                         |                        |
| 2565.45                                                                                      | 2565.36 (0.09) | (R) | AATVGSLAGQPLQERAQAWGERLR                         |                        |
| <b>9) CLUSTERIN precursor; NCBI # 42716297 (Res. 269-278; C-t of beta-chain, minus R279)</b> |                |     |                                                  |                        |
| 822.41                                                                                       | 822.43 (0.02)  |     | HFFFPK                                           |                        |
| 1277.71                                                                                      | 1277.71 (0.00) |     | HFFFPKSRIV (R)                                   |                        |

**10) Bradykinin (and des-Arg bradykinin) -- HMW Kininogen; NCBI # 125507 (Res. 381-389)**

|         |                |           |
|---------|----------------|-----------|
| 904.48  | 904.46 (0.02)  | RPPGFSPF. |
| 1060.57 | 1060.57 (0.00) | RPPGFSPFR |

|         |                                   |           |
|---------|-----------------------------------|-----------|
| 920.41  | 904.46[Pro <sub>hydroxyl</sub> ]  | = 920.45  |
| 1076.53 | 1060.57[Pro <sub>hydroxyl</sub> ] | = 1076.56 |

**HMW Kininogen; NCBI # 125507 (Res. 438-456 and 458-477, separated by R457)**

|         |                    |                        |
|---------|--------------------|------------------------|
| 1943.88 | 1943.90 (0.02)     | NLGHGHKHERDQGHGQ (R)   |
| 2209.08 | 2209.05 (0.03) (R) | KHNLGHGHKHERDQGHGQ (R) |
| 2126.94 | 2127.00 (0.06) (R) | GHGLGHGHEQQHGLGHGK (K) |

**11) FACTOR XIIIa; NCBI 119720 (Res. 14-38 of precursor; C-t of PROPEPTIDE)**

|         |                |                              |
|---------|----------------|------------------------------|
| 2602.15 | 2602.30 (0.15) | (R) AVPPNNSNAEDDLPTVELQGVVPR |
|---------|----------------|------------------------------|

**12) TRANSTHYRETIN precursor ('prealbumin'); NCBI # 136464 (Res. 101-123)**

|         |                |                             |
|---------|----------------|-----------------------------|
| 2451.11 | 2451.19 (0.08) | (K) ALGISPFHEHAEVVFTANDSGPR |
|---------|----------------|-----------------------------|

**13) PLATELET BASIC PROTEIN Precursor; NCBI # 129874 (Res. 108-127; C-t)**

(Mature peptides: NAP-2; CTAP-III; CXCL7; beta-thromboglobulin; LA-PF4;...)

|         |                |                                       |
|---------|----------------|---------------------------------------|
| 2279.18 | 2279.26 (0.08) | PDAPRIKKIVQKKLAGDESAD  <sub>C-t</sub> |
|---------|----------------|---------------------------------------|

**Table S4: Serum Peptide Precursor Proteins (Villanueva *et al.*)**

1) FIBRINOGEN ALPHA (NCBI # 4033511) -- **FPA** = 20-35

1 mfsmriyclv lsvvgtawt**A DSGEGDFLAE GGGVR**gprvv erhqsackds dwpfcsdedw  
61 nykcpsgcrm kglidevnqd ftnrinklkn slfeyqknnk dshslttnim eilrgdfssa  
121 nnrndntynrv sedllrsriev lkrkviekvq hiqlqlknvr aqlvdmkrle vdidikirsc  
181 rgscsralar evdlkdyedq qkqleqviah dllpsrdrqh lplikmkpvp dlvpgnfksq  
241 lqkvppewka ltdmpqmrme lerpggneit rggstsygtg setesprnps sagswnsgss  
301 gpgstgnrnp gssgtggtat wkpqssgpgs tgswnsgssg tgstgnqnpq sprpgstgtw  
361 npgssergsa ghwtssssvs gstgqwhses gsfrpdspgs gnarpnnpdw gtfeevsgnv  
421 spgtrreyht eklvtskgdk elrtgkekvt sgsttttrrs csktvtktvi gpdghkevtk  
481 evvtsedgsd cpeamdltl sgigtldgfr hrhpdeaaff dtastgktfp gffspmlgef  
541 vsetesrgse **sgiftntkes sshhpqiaef psrqksssys kqftsstsyn rgdstfesks**  
601 **ykmadeagse adhegthstk rghaksrpvr** gihtsplgkp slsp



2) COMPLEMENT C3 (NCBI # 68766) -- C3f = 1304-1320

1 mgptsgpsll llllthlpla lgsmpysiit pnllrlesee tmvleahdaq gdpvptvtvh  
 61 dfpgkklvls sektvltpat nhmgnvtfti panrefkseke grnkfvtvqa tfgtqvvekv  
 121 vlvsllqsgyl fiqtdktyt pgstvlryrif tvnhkllpvg rtvmvnienv egipvkqds1  
 181 ssqnqlglvlp lswdipelvn mgqwkirayy ensppqgvfst efekyevlp sfefivepte  
 241 kfyiyinekg levtitarfl ygkkvegtaf vifgiqdgeq rislpselkr ipiedgsgev  
 301 vlsrkvlldg vqnlraedlv gkslyvsatv ilhsgsdmvq aersgipivt spyqihftkt  
 361 pkyfkgmpf dlmvfvtnpd gspayrvpva vqgedtvqsl tqgdgvakls inthpsqkpl  
 421 sitvrtkkqe lseaeqatrt mgalpystvg nsnylhslv lrtelrpget lnnvfl1rmd  
 481 raheakiry tylinmkgrl lkagrqvrep gqdlvvlpls ittdfipsfr lvayytliga  
 541 sgqrevvads vwvdvkdscv gslvvksgqs edrqpvpqqq mtlkieghg arvvlavdk  
 601 gvfvlnkknk ltqskiwdvv ekadigctpg sgkdyagvfs dagltftsss gqqtagrael  
 661 qcpqpaarr rsvqltekrm dkvgkypkel rkccedgmre nprfscqrr trfislgeac  
 721 kkvfldccny itelrrqhar ashlgarsn ldediaeen ivsrsefepes wlwnvedlke  
 781 ppkngistkl mniflkdsit tweilavsms dkkgicvadp fevtvmqgdf idlrlpysv  
 841 rneqveirav lynyrqngel kvrvellhnp afcslattkr rhqqtvtipp ksslsvpyvi  
 901 vplktglqev evkaavyhhf isdgvrkslk vvpiegirmnk tvavrtldpe rlgregvqke  
 961 dippadlsdq vpdtesetri llqgtpvagm tedavdaerl khliivtpsgc geqnmigmt  
 1021 tviavhyld teqwekfgle krqgalelik kgytqqlafr qpssafaaafv krapstwlta  
 1081 yvkvfslav nliaidsqvl cgavkwllile kqkpdgvfge dapvihqemi ggrrnnnek  
 1141 maltafvlis lqekdicee qvnslpqgsit kagdfleany mnlqrsytva iagyalagmg  
 1201 rllgpllnkf lttakdknrw edpgkqlynv eatsyallal lqlkdfdfvp pvvrwlneqr  
 1261 ygggygstq atfmvfqala qyqkdapdhq elnldvslql psr**SSKITHR IHWESASLLR**  
 1321 seetkenegf tvtaegkggg tlvsvvtmyha kakdqltcnk fdlkvtkpa petekrpqda  
 1381 kntmileict ryrgdqdatm silidismmtg fapdtddlkq langvdryis kyeldkafsd  
 1441 rntliiylkd vshseddcla fkvhqyfnve liqpgavkvy aaynleesct rfyhpekedg  
 1501 klnklcrdel crcaeencfi qksddkvtle erldkacepg vdyvyktrlv kvqlsndfde  
 1561 yimaieqtik sgsdevqvvg qrtfispikc realkleekk hylmwglssd fwgekpnlsy  
 1621 iigkdtwveh wpeedecqde enqkqcqdlg aftesmvvfg cpn



3) COMPLEMENT C4 PRECURSOR (NCBI # 201411771) -- **C4-alpha** = 680-1446

1 mrlwgliwa ssfttllslqk prlllfpsv vhlgvplsvg vqlqdvprgq vvkgsvflrn  
 61 psrnnvpcsp kvdfntlsser dfallslqvp lkdakscglh qlrlrgpevql vahspwlkds  
 121 lsrttniqgi nllfssrrgh lflqtdqpiy npgqrvyrv faldqkmrps tdtitvmven  
 181 shglrvrkke vymphssifqd dfvipdisep gtwkisarfs dglesnsstq fevkkyyvlpn  
 241 fevkitpgkp yiltpvghld emqlidiqary iygkpvqgva yvrfgllded gkktffrgle  
 301 sqtklvngqs hislskaefq daleklmgi tdlqglrlvy aaaiiespgg emeeaeltsw  
 361 yfvsspsfld lsktkrhlvp gaplllqalv remsgspasg ipvksatvs spgsvpevqd  
 421 iqqntdgsqg vsipiiipqt iselqlsvsa gsphpaiarl tvaapps9gp gflsierpds  
 481 rprrvgtltn lnlravgsa tfshyyymil srgqivfmnr epkrtltsvs vfvdhhlaps  
 541 fyfvafyyhg dhpvanslr dvqagacegk lelsvdgakq yrngesvklh letdslalva  
 601 lgaldtalya agskshkpln mgkvfeamns ydlgcpgpgg dsalqvfaa glafsdgdqw  
 661 tlsrkrllscp kekttrkkRN VNFQKAIN EK LGQYASPTAK RCCQDGVTRL PMMRSCEQRA  
 721 ARVQQPDCRE PFLSCCQFAE SLRKKSRDKG QAGLQRALEI LQEEEDLIDED DIPVRSFFPE  
 781 NWLWRVETVD RFQILTLWLP DSLTTWEIHG LSLSKTKGLC VATPVQLRVF REFHLHLRLP  
 841 MSVRRFEQLE LRPVLYNYLD KNLTVSVHVS PVEGLCLAGG GGLAQQVLVP AGSARPVAFS  
 901 VVPTAAAVS LKVVARGSFE FPVGDAVSKV LQIEKEGAIH REELVYELNP LDHRRGTLEI  
 961 **PGNSDPNMIP** **DGDFNSYVRV** TASDPLD TLG SEGALSPGGV ASLLRLPRGC GEQTMIIYLAP  
 1021 TLAASRYLDK TEQWSTLPPE TKDHAVDLIQ KGYMRIQOFR KADGSYAOWL SRDSSTWLTA  
 1081 FVLKVLSLAQ EQVGGSPPEKL QETSNWLLSQ QQADGSFQDP CPVLDRSMQG GLVGNDETVA  
 1141 LTAFTVTIALH HGLAVFQDEG AEPLKQRVEA SISKANSFLG EKASAGLLGA HAAAITAYAL  
 1201 SLTKAPVDLL GVAHNNLMAM AQETGDNLYW GSVTGSQSNV VSPTPAPRNP SDPMPQAPAL  
 1261 WIETTAYALL HLLHEGKAE MADQASAWLT RQGSFQGGFR STQDVTIALD ALSAYWIASH  
 1321 TTEERGLNVT LSSTGRNGFK **SHALQLNNRQ** **IRGLEEELQF** **SLGSKINVKV** **GGNSKGTLLKV**  
 1381 **LRTYNVLD** **DMK** NTTCCQDLQIE VTVKGHVEYT MEANEDYEDY EYDELPAKDD PDAPLQPVTP  
 1441 LQLFEGrrnr rreapkvve eqesrvhytv ciwrngkvgl sgmaiadvtl lsgfhalarad  
 1501 lekltslsdr yvshfetegp hvlllyfdsvp tsrecvgfea vqevpvglvq pasatlydy  
 1561 nperrcsvfy gapsksrlla tlcsaevcqc aegkcprqrr alerqlqded gymkfacyy  
 1621 prveygfvkv vlredraaf rlfetkitqv lhftkdvkaa anqmrnflvr ascrllrlep  
 1681 keylimgldg atydleghpq yllidsnswie empserlcrs trqraacaql ndflqeygtq  
 1741 gcqv

4) ITIH4 (NCBI # 13432192) — **PROPEPTIDE** = 662-688

1 mkpprpvrtc skvlvllsl1 aihqtttaek ngidiysltv dsvssrfah tvvtssrvvnr  
61 antvqeatfq melpkkafit nfsmnidgmt ypgiikekae aqaqysaava kgsaglvka  
121 tgrnmeqfqv svsvapnaki tfelvyee11 krrlgvyell lkvrpqqlvk hlqmdihife  
181 pqgisflete stfmtnqlvd alttwqnktk ahirfkptls qqkspeqqe tvldgnliir  
241 ydvdraisgg siqiengyfv hyfapegltt mpknvvfvid ksgmsgarki qgtrealiki  
301 lddlsprdqf nlivfsteat qwrpslvpas aenvnkarsf aagiqalggt nindamlmav  
361 qlldssnqee rlpegsvsli illtdgdptv getnprsiqn nvreaavgry slfclgfgfd  
421 vsyaflekla ldngglarri heddsalql qdfyqevanp lltavtfeyp snaveevtqn  
481 nfrllfkge mvvagklqdr gpdvltatvs gklptqnitf qtesssvaeqe aefqspkyif  
541 hnfmrlway ltiqqlleqt vsasadadqqa lrnqalnsl1 aysfvtplts mvvtkpddqe  
601 qsqvaekpme gesrnrnvhs gstffkyylq gakipkpeas fsprgrgwnrq agaagsrmnf  
661 rPGVLSSRQL GLPGPPDVPD HAAYHPFRrl ailpasappa tsnpdpavsr vmnmkieett  
721 mttqtapiq apsailplpg qsverlcvdv rhrqgpvnll sdpeqgvevt gqyerekaqf  
781 swievtfknv lvvvhaseph vvvtrnrrss aykwketlfs vmpglkmtmd ktgl111sdp  
841 dkvtigl1fw dgrgeglr11 lrdtdrfssh vgg1lgqfyq evlwgspaas ddgrrtlrvq  
901 gndhsatrer rldyqegppg veiscswvel

5) PRO1851 (NCBI # 7770149) – ITIH4 alternative spliced form

1 mpknvvfvid ksgmsgarki qqtrealiki lddlsprdqf nlivfsteat qwrpslvpas  
61 aenvnkarsf aagiqalggt nindamlmav qlldssnqee rlpegsvsli illtdgdptv  
121 getnprsiqn nvreavsgry slfclgfgfd vsyaflekla ldngglarri hedsdalsql  
181 qdfyqevanp lltavtfeyp snaveevtqn nfrllfkgs mvvagklqdr gpdvltatvs  
241 gklptqnitf qtessvaeqe aefqspkyif hnfmrlway ltiqqllleqt vsasdadqqa  
301 lrnqalnls1 aysfvtplts mvvtpkddqe qsqvaekpme gesrnr**nvhs** **agaagsrmnf**  
361 **rpqvlss**rq1 glpgppdvdpd haayhpfrrl ailpasappa tsnpdpavsr vmnmkieett  
421 mttqtpacps csrsrapavp apiqapsail plpgqsverl cvdprhrqgp vnllsdpeqg  
481 vevtgqyere kagfswievt fknplvwvha spehvvvtrn rrssaykwke tlfsvmpgk  
541 mtmdktglll lsdpdkvtig llfwdgrgeg lrlllrtdtr fsshvggtlg qfyqevlwgs  
601 paasddgrrt lrvqgndhsa trerrldyqe gppgveiscw svel

6) APOLIPOPROTEIN A-I (NCBI # 4557321)

1 mkaavltlav lfltgqarh fwqqdeppqs pwdrvkdlat vyvdlkdsg rdyvsqfegs  
61 algkqlnlk1 ldnwdsvtst fsklreqlqp vtqefwdnle keteglrqem skdleevkak  
121 vqpylddfqk kwqeemelyr qkveplrae1 gegargqlhe lqeklsplge emrdrarahv  
181 dalrthlapy sdelrqrlaa rlealkengg arlaeyhaka tehlstlsek akpaledlrg  
241 gllpvlesfk vsflsaleey tkklntg

7) APOLIPOPROTEIN A-IV (NCBI # 114006)

1 mflkavvltl alvavagara evsdaqvatv mwdyfsqlsn nakeavehlq kseltqqlna  
61 lfqdklgevn tyagdlqkk1 vpfatelher lakdseklke eigkeleelr arllphanev  
121 sqkigdnlre lqqrlepyad qlrtqvntqa eqlrrqltpy aqrmervlre nads1qasl  
181 phadelkaki dqnveelkgr ltpyadefkv kidqtveelr rslapyagdt geklnhqleg  
241 ltfqmkknae elkarisasa eelrqrlapl aedvrgnlkg nteglqksla elgghldqqv  
301 eefrrrrvepy genfnkalvq qmeqlrqklg phagdveghl sflekdlrdk vnsffstfke  
361 kesqdktlsl peleqqqqeqq qeqqqeqvqm lapels

8) APOLIPOPROTEIN E (NCBI # 114039)

1 mkvlwaallv tflagcqakv egavetepep elrqqtewqs ggrwelaalgr fwdylrwvqt  
61 lseqvqeell ssqvtqelra lmdetmkelk aykseleeeql tpvaeetrar lskelqaaqa  
121 rlgadmedvc grlvqyrgev qamlggstee lrvrlashlr klrkrllrda ddlqkrlavy  
181 qagaregaer glsairerlg plveqgrvra atvgslaggp lgeraqawge rlrarmeemg  
241 srtrdrldv keqvaevrak leeqaqqirl qaeafqarlk swfeplvedm grqwaglvk  
301 vqaavgtsaa pvpsdnh

9) CLUSTERIN precursor; 'APO J' (NCBI # 42716297)

BETA-CHAIN = 192-279; *alpha-chain* = 280-325

```
1  mqvcspqrg cvreqsaint appsaahaas pggarghrvp lteackdsri ggmmktlllf
61  vgl'lltwesg qvlgdqtvsd nelqemsngg skyvnkeiqn avngvkqikt liektneerk
121 tllsnleeak kkkedalnet resetklkel pgvnetmma lweeckpclk qtcmkfyarv
181 crsgsglvgr qLEEFLLNQSS PFYFWMNGDR IDSLENDRO QTHMLDVMQD HFSRASSIID
241 ELFQDRFFTR EPQDTYHYLP FSLPHRRRPF FFPKSRIVRs Impfspyep1 nfhamfqpf1
301 emiheaqqam dihfhsfafq hpptefireg dddrtvcrei rhnstgclrm kdqcdkcrei
361 lsvdcstnnp sqaklrreld eslqvaerlt rkynellksy gwkmIntssl leqlneqfnw
421 vsrlanltqg edqyyllrvtt vashtsdsdv psgvtevvvk lfdsdpitvt vpvevsrknP
481 kfmetvaeka lqeyrkkhre e
```

10) HMW KININOGEN (NCBI # 125507) — contains **BRADYKININ** (381-389)

1 mklitilflc srlllslqtq sqseeidcnd kdlfkavdaa lkkynsqnqs nnqfvlyrit  
61 eatktvgsdt fysfkyeike gdcpvqsgkt wqdceykdaa kaatgectat vgkrsstkfs  
121 vatqtcqitp aegpvvtaqy dclgcvhpis tqspdlepil rhgiqyfnnn tqhsslfmln  
181 evkraqrqv aglnfritys ivqtncsken flfltpdcks lwnqdtgect dnayidigl  
241 iasfsqncdi ypgkdfvqpp tkicvgcprd iptnspelee tlthtitkln aennatfyfk  
301 idnvkkarvq vvagkkyfid fvarettsk esneeltesc etkklgqsld cnaevyvvpw  
361 ekkiyptvnc qplgmislmk **RPPGFSPFRs** srigeikeet tvsphtsma paqdeerdsg  
421 keqghtrrhg wghekqr**khn** **lgghghkherd** **qghghgrghg** **lgghheggghg** **lgghghkfkld**  
481 ddlehqggghv ldhghkhkhg hghghkhknkg kknghknwk tehlassed sttpsagtqe  
541 ktegtpips lakpgvtvtf sdfqdsdlia tmmppispap iqsdwddwipd iqtbpnglsf  
601 npisdfpdt spkcpgrpwk svseinpttq mkesyyfdlt dgls



11) FACTOR XIIIIa (NCBI # 119720) -- PROPEPTIDE = 2-38

1 mSETSRTAFG GRRAVPPNNS NAAEDDLPTV ELQGVVPRgv nlqeflnvts vhlferwdt  
61 nkvdhhtdky ennkliivrg qsfyvqidfs rpydprrdlf rveyvigryp qenkgyipv  
121 pivselqsgk wgakivmred rsvrlsiqss pkcivgkfrm yvavwtpyg v lrtsrnpetd  
181 tyilfnpwe ddavylndek ereeyvlndi gvifygevdn iktswsygq fedgildtcl  
241 yvmdraqmdl sgrgnpikvs rvgsamvnak ddegvlvgs w dniyaygvpp sawtgsvdil  
301 leyrssenpv ryggqcwvfag vfntflrclg iparivtnyf sahdndanlq mdifleedgn  
361 vnskltkdsv wnyhcwneaw mtrpdlpvgf ggwqavdstp qensdgm yrc gpasvqaikh  
421 ghvcfqfdap fvfaevnsdl iytakkdgt hvvenvdath igklivtkqi ggdgmmditd  
481 tykfgeggee erlalaletalm ygakkplnte gvmksrsnvd mdfevenavl gkdfklsitf  
541 rnnshnryti taylsanitf ytgvpkaefk ketfdvtlep lsfkkeavli qageymgql  
601 eqaslhfvt arinetrdvl akqkstvti peiikvrgt qvvgdmtvt vqftnplket  
661 lrvvwvhldg pgvtrpmkkm freirpnstv qweevcrpwv sghrkliasm ssdslrhvyg  
721 eldvqiqrrp sm



12) TRANSTHYRETIN precursor (NCBI # 136464)

1 *mashrlllllc laglvfvsea gptgtgeskc plmvkvldav rgspainvav hvfrkaaddt*  
61 *wepfasgkts esgelhgltt eeefvegiyk veidtksywk algispfheh aevvftands*  
121 **gpr**rytiaal lspysystta vvtnpke

13) Platelet basic protein precursor (NCBI # 129874)

Signal peptide (1-34)

CTAP-III, TC-2 (44-128); beta-TG (48-128); NAP-2 (55-128); CXCL7 (?-128)

1 *mslrldttps cnsarplhal qvllllslsl talasstkqg tkrnlakgke esldsdlxae*  
61 *lrcmciktts gihpkniqsl evigkgthcn qveviatlkd grkicldpda prikkivqkk*  
121 **lagdesad**

**Figure S1**

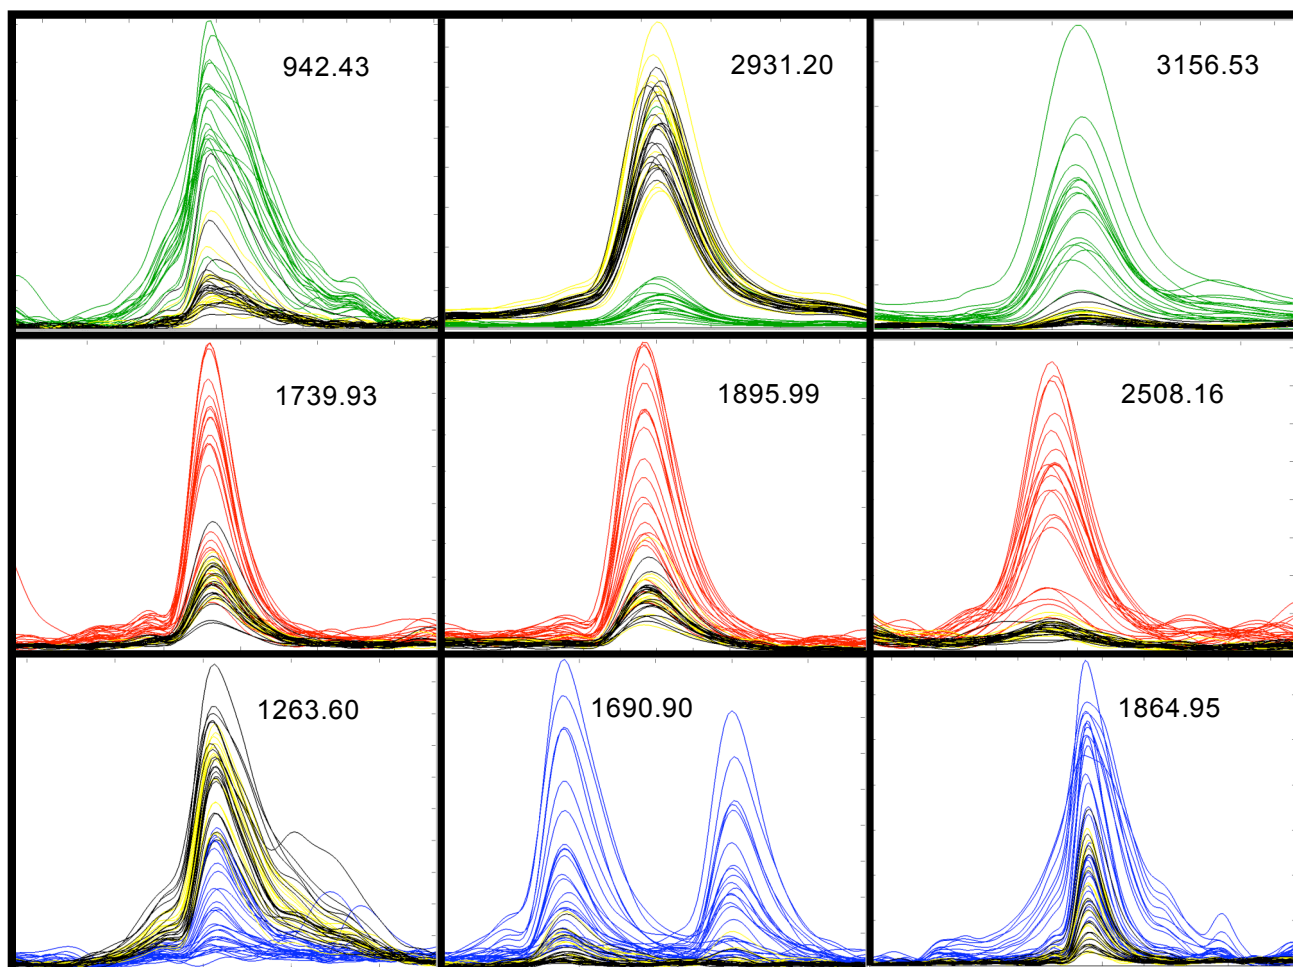

Supplement: sd1 [file 1]
